# Supplementary material
Source: PubMed Central journal article supplement (PMC5933307)
Supplement: EHP1545.s001.acco.pdf [file EHP1545.s001.acco.pdf]

**Note to readers with disabilities:** *EHP* strives to ensure that all journal content is accessible to all readers. However, some figures and Supplemental Material published in *EHP* articles may not conform to [508 standards](#) due to the complexity of the information being presented. If you need assistance accessing journal content, please contact [ehp508@niehs.nih.gov](mailto:ehp508@niehs.nih.gov). Our staff will work with you to assess and meet your accessibility needs within 3 working days.

### **Supplemental Material**

#### **Associations between Ambient Fine Particulate Oxidative Potential and Cardiorespiratory Emergency Department Visits**

Joseph Y. Abrams, Rodney J. Weber, Mitchel Klein, Stefanie E. Samat, Howard H. Chang, Matthew J. Strickland, Vishal Verma, Ting Fang, Josephine T. Bates, James A. Mulholland, Armistead G. Russell, and Paige E. Tolbert

#### **Table of Contents**

##### **Study Data.**

**Table S1:** Summary of measurement of the oxidative potential of water-soluble PM<sub>2.5</sub> as measured by the DTT assay (OP<sup>DTT</sup>), measured in nmol/min/m<sup>3</sup>, by sampling period, June 2012 – April 2013. Pearson correlation coefficients reported between fixed and mobile sites for each sampling period

**Figure S1:** Distribution of the oxidative potential of water-soluble PM<sub>2.5</sub> as measured by the DTT assay (OP<sup>DTT</sup>), by day of week (excluding holidays), June 2012 – April 2013, Atlanta, GA. Boxes encompass 25<sup>th</sup> through 75<sup>th</sup> percentiles, middle horizontal line represents the median, red dot represents the mean, whiskers extend to the most extreme point within 1.5 interquartile ranges of the box, dots indicate outliers.

**Table S2:** Descriptive data for OP<sup>DTT</sup> and other air quality variables measured during the same time frame, June 2012 – April 2013.

## Supplemental Material

Data for this study were collected for 196 days over eight sampling periods at the Jefferson Street (JST) study site in Atlanta, GA, from June 2012 – April 2013. In addition to this fixed site, an additional mobile sampling instrument was deployed at a different location for each sampling period in order to explore spatial heterogeneity in  $OP^{DTT}$ . (V. Verma et al. 2014) These sites were:

- Roadside (RS), located about 2km from JST, within a few meters of a major interstate highway.
- Georgia Tech (GT), located about 500m from the same interstate highway, roughly between JST and RS
- Yorkville (YRK), located in a rural area about 70km west of downtown Atlanta

During two sampling periods, the mobile instrument was colocated with the fixed instrument at JST to assess measurement differences between instruments. Summary data for the fixed and mobile instruments are shown in the table below.

**Table S1:** Summary of measurement of the oxidative potential of water-soluble PM<sub>2.5</sub> as measured by the DTT assay ( $OP^{DTT}$ ), measured in nmol/min/m<sup>3</sup>, by sampling period, June 2012 – April 2013. Pearson correlation coefficients reported between fixed and mobile sites for each sampling period

| Sampling period | Sampling dates | Fixed site |                 | Mobile site |                 | Days in common | Correlation |
|-----------------|----------------|------------|-----------------|-------------|-----------------|----------------|-------------|
|                 |                | Location   | Mean $OP^{DTT}$ | Location    | Mean $OP^{DTT}$ |                |             |
| 1               | 6/8 - 7/15     | JST        | 0.29            | YRK         | 0.27            | 31             | 0.69        |
| 2               | 7/24 - 8/31    | JST        | 0.29            | GT          | 0.24            | 37             | 0.78        |
| 3               | 9/6 - 10/4     | JST        | 0.34            | RS          | 0.32            | 26             | 0.52        |
| 4               | 11/16 - 11/30  | JST        | 0.46            | JST         | 0.45            | 13             | 0.87        |
| 5               | 12/6 - 1/4     | JST        | 0.44            | YRK         | 0.28            | 21             | 0.68        |
| 6               | 1/27 - 2/27    | JST        | 0.33            | RS          | 0.36            | 29             | 0.84        |
| 7               | 3/5 - 3/27     | JST        | 0.32            | GT          | 0.25            | 22             | 0.56        |
| 8               | 3/30 - 4/12    | JST        | 0.14            | JST         | 0.17            | 14             | 0.67        |

**Figure S1:** Distribution of the oxidative potential of water-soluble PM<sub>2.5</sub> as measured by the DTT assay (OP<sup>DTT</sup>), by day of week (excluding holidays), June 2012 – April 2013, Atlanta, GA. Boxes encompass 25<sup>th</sup> through 75<sup>th</sup> percentiles, middle horizontal line represents the median, red dot represents the mean, whiskers extend to the most extreme point within 1.5 interquartile ranges of the box, dots indicate outliers.

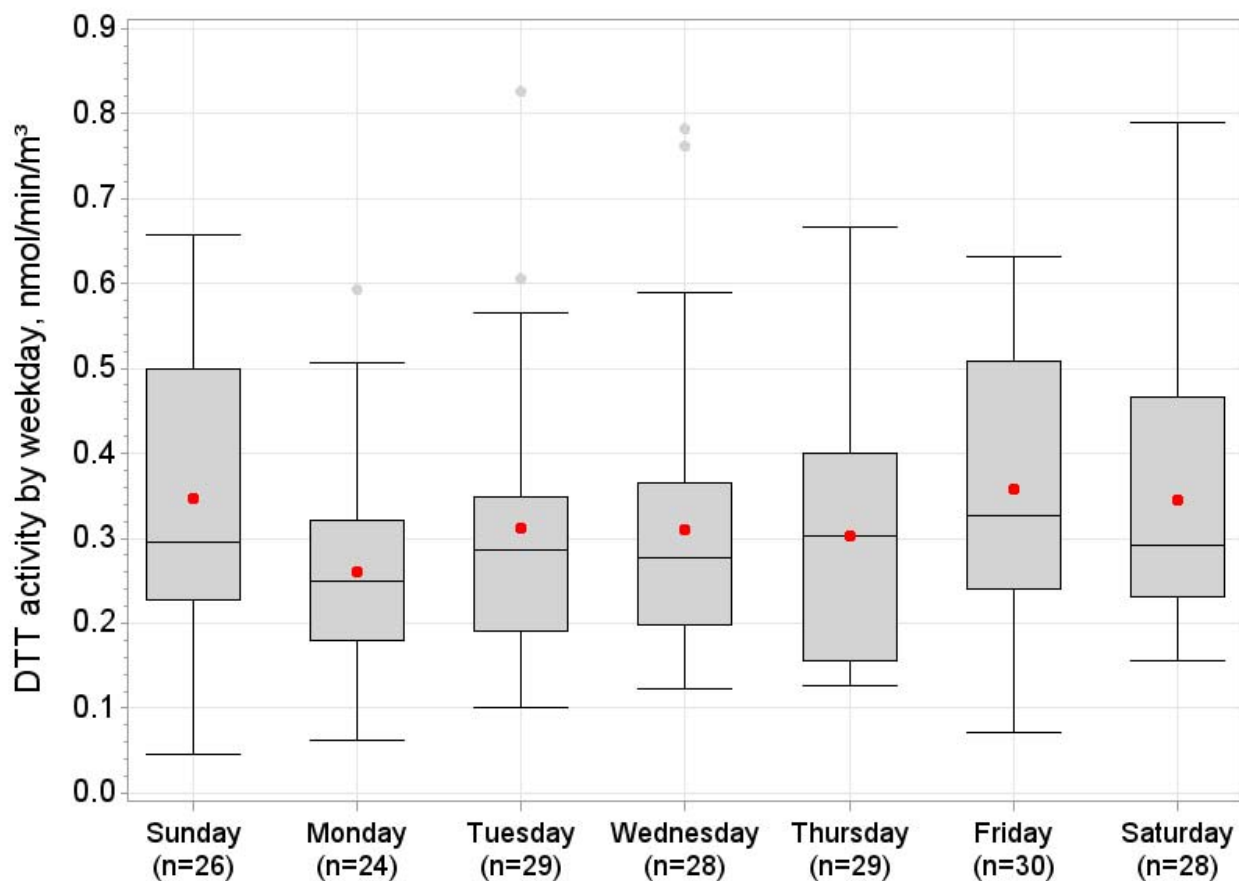

**Table S2:** Descriptive data for OP<sup>DTT</sup> and other air quality variables measured during the same time frame, June 2012 – April 2013.

| Variable          | N   | Unit                    | Mean  | Median | Range         | IQR           |
|-------------------|-----|-------------------------|-------|--------|---------------|---------------|
| OP <sup>DTT</sup> | 196 | nmol/min/m <sup>3</sup> | 0.32  | 0.29   | 0.05 - 0.83   | 0.20 - 0.41   |
| CO                | 196 | ppb                     | 0.43  | 0.35   | 0.14 - 1.32   | 0.26 - 0.54   |
| O <sub>3</sub>    | 196 | ppm                     | 44.82 | 42.99  | 13.07 - 99.64 | 31.71 - 57.87 |
| NO <sub>2</sub>   | 196 | ppm                     | 28.29 | 28.35  | 5.69 - 59.90  | 20.47 - 35.80 |
| SO <sub>2</sub>   | 196 | ppm                     | 2.31  | 1.35   | 1.00 - 14.10  | 1.00 - 3.00   |
| PM <sub>2.5</sub> | 196 | µg/m <sup>3</sup>       | 9.14  | 8.70   | 1.50 - 25.20  | 6.60 - 11.55  |
| NO <sub>3</sub>   | 194 | µg/m <sup>3</sup>       | 0.55  | 0.32   | 0.02 - 2.37   | 0.19 - 0.73   |
| SO <sub>4</sub>   | 196 | µg/m <sup>3</sup>       | 1.89  | 1.78   | 0.44 - 5.27   | 1.29 - 2.35   |
| NH <sub>4</sub>   | 193 | µg/m <sup>3</sup>       | 0.72  | 0.68   | 0.18 - 2.15   | 0.48 - 0.89   |
| EC                | 191 | µg/m <sup>3</sup>       | 0.65  | 0.58   | 0.14 - 1.83   | 0.44 - 0.78   |
| OC                | 190 | µg/m <sup>3</sup>       | 2.54  | 2.36   | 0.60 - 6.90   | 1.64 - 3.17   |
| Mn                | 158 | ng/m <sup>3</sup>       | 1.49  | 1.21   | 0.00 - 8.10   | 0.83 - 1.73   |
| Fe                | 157 | ng/m <sup>3</sup>       | 15.28 | 12.74  | 0.00 - 47.10  | 7.15 - 20.42  |
| Cu                | 152 | ng/m <sup>3</sup>       | 10.40 | 7.91   | 0.00 - 42.48  | 3.41 - 16.66  |
